# Supplementary material for: Consequences of the COVID-19 Lockdown in Germany: Effects of Changes in Daily Life on Musical Engagement and Functions of Music
Source: MDPI journal article supplement (doi:10.3390/ijerph181910463), 2021-10-05
Supplement: s1 [file s1]

## Supporting Information

### Consequences of the COVID-19 Lockdown in Germany: Effects of Changes in Daily Life on Musical Engagement and Functions of Music

Natalie A. Roesse & Julia Merrill

## Methods

### Musical Styles

Additionally, participants chose from a list of 18 musical styles (plus ‘other’), which ones they listened to before and during the lockdown (they could choose as many as they wanted).

### Mood

To evaluate the mood the participants had been in for the last few days, the PANAVA-KS (Schallberger, 2005) was assessed that evaluates the emotional dimensions of valence, positive and negative arousal. Items were evaluated on a 5-point Likert scale from not at all (1) to very much (5).

### Reliability of Questionnaires

|                                               | Cronbach’s Alpha<br>Questionnaire<br><i>before</i> the<br>lockdown | Cronbach’s Alpha<br>Questionnaire<br><i>during</i> the<br>lockdown | <i>N</i> |
|-----------------------------------------------|--------------------------------------------------------------------|--------------------------------------------------------------------|----------|
| Perceived Changes in Music Listening Behavior |                                                                    | 0.792                                                              | 12       |
| Active Musical Engagement                     | 0.827                                                              | 0.820                                                              | 8        |
| Attributes of Chosen Music                    | 0.440                                                              | 0.570                                                              | 11       |
| Functions of Music Listening                  | 0.837                                                              | 0.873                                                              | 16       |
| BFI-2                                         |                                                                    | 0.893                                                              | 36       |
| PSRS                                          |                                                                    | 0.374                                                              | 9        |
| Worries                                       |                                                                    | 0.775                                                              | 10       |
| Everyday Life                                 |                                                                    | 0.681                                                              | 14       |

## Descriptive Statistics

### Worries

**Figure 1**

*Boxplot for Items on Worries*

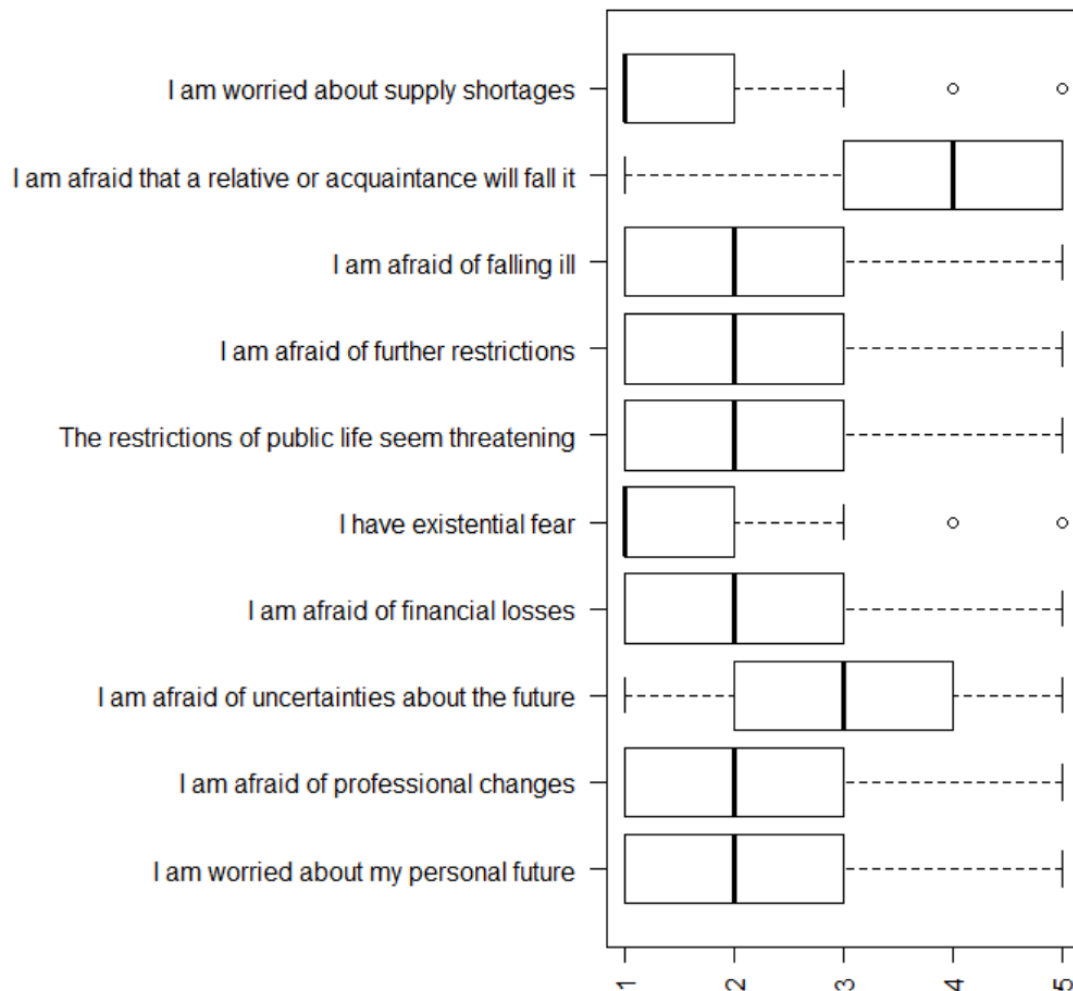

*Note. Scale: does not apply (1) – applies (5).*

**Table 1**

*Mean and SD for Items on Worries*

|    | variable        | n   | mean | sd    |
|----|-----------------|-----|------|-------|
| 1  | cw1_ill         | 539 | 2.43 | 1.32  |
| 2  | cw10_public     | 539 | 2.19 | 1.28  |
| 3  | cw2_aqu_ill     | 539 | 3.81 | 1.18  |
| 4  | cw3_prof_change | 539 | 2.51 | 1.42  |
| 5  | cw4_existence   | 539 | 1.84 | 1.16  |
| 6  | cw5_finance     | 539 | 2.15 | 1.30  |
| 7  | cw6_supply      | 539 | 1.65 | 0.942 |
| 8  | cw7_future      | 539 | 2.46 | 1.37  |
| 9  | cw8_restrict    | 539 | 2.37 | 1.33  |
| 10 | cw9_uncertain   | 539 | 2.73 | 1.37  |

## Everyday Life

**Figure 2**

*Boxplot for Items on Everyday Life.*

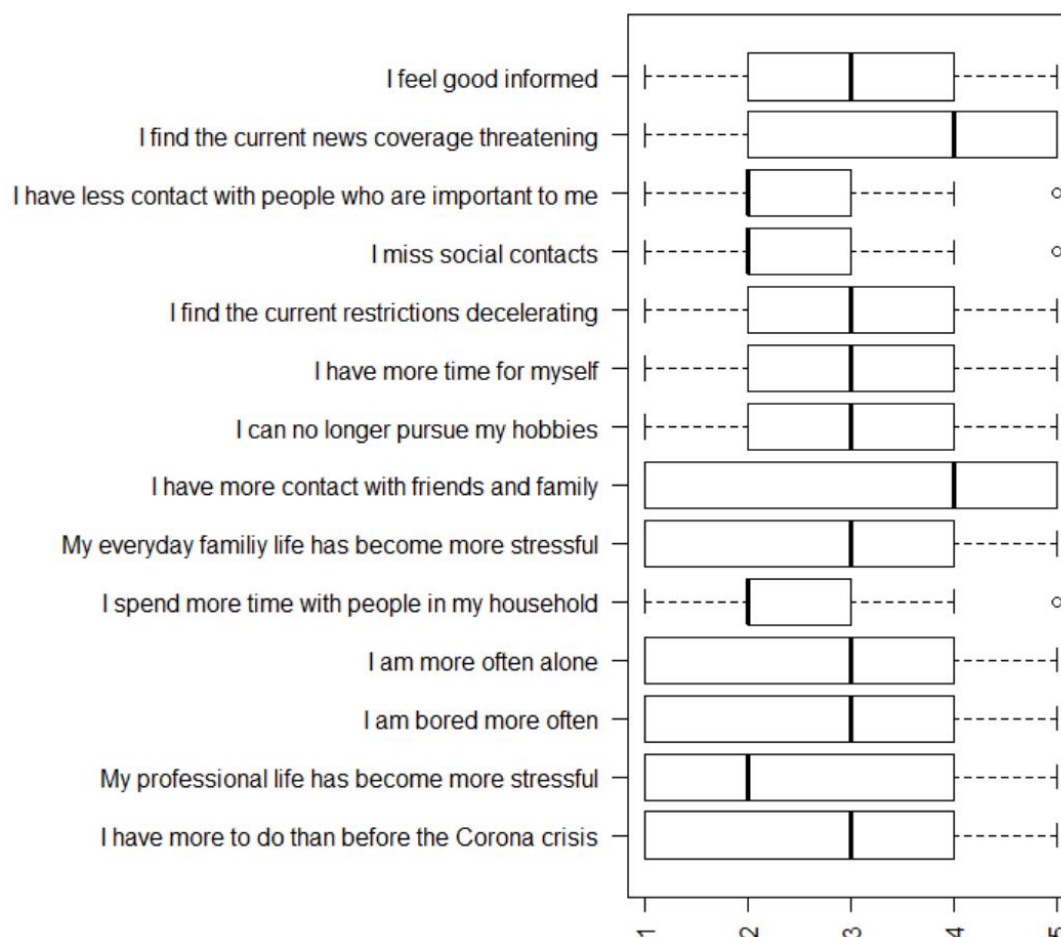

*Note. Scale: does not apply (1) – applies (5).*

**Table 2**

*Mean and SD for Items on Everyday Life*

|    | variable         | n   | mean | sd    |
|----|------------------|-----|------|-------|
| 1  | ce1_household    | 539 | 2.45 | 1.09  |
| 2  | ce10_alone       | 539 | 2.76 | 1.46  |
| 3  | ce11_hobbies     | 539 | 2.81 | 1.27  |
| 4  | ce12_news        | 539 | 3.41 | 1.49  |
| 5  | ce13_info        | 539 | 3.08 | 0.972 |
| 6  | ce14_bored       | 539 | 2.72 | 1.59  |
| 7  | ce2_prof_life    | 539 | 2.69 | 1.66  |
| 8  | ce3_more2do      | 539 | 2.72 | 1.64  |
| 9  | ce4_more_time    | 539 | 2.92 | 1.24  |
| 10 | ce5_less_contact | 539 | 2.59 | 0.925 |
| 11 | ce6_miss_social  | 539 | 2.65 | 0.923 |
| 12 | ce7_deceler      | 539 | 3.10 | 1.11  |
| 13 | ce8_fam_stress   | 539 | 2.73 | 1.67  |
| 14 | ce9_contact_fam  | 539 | 3.18 | 1.62  |

## Perceived Changes in Musical Behavior During the Lockdown

**Figure 3**

*Boxplot for Items on Perceived Music Listening During the Lockdown*

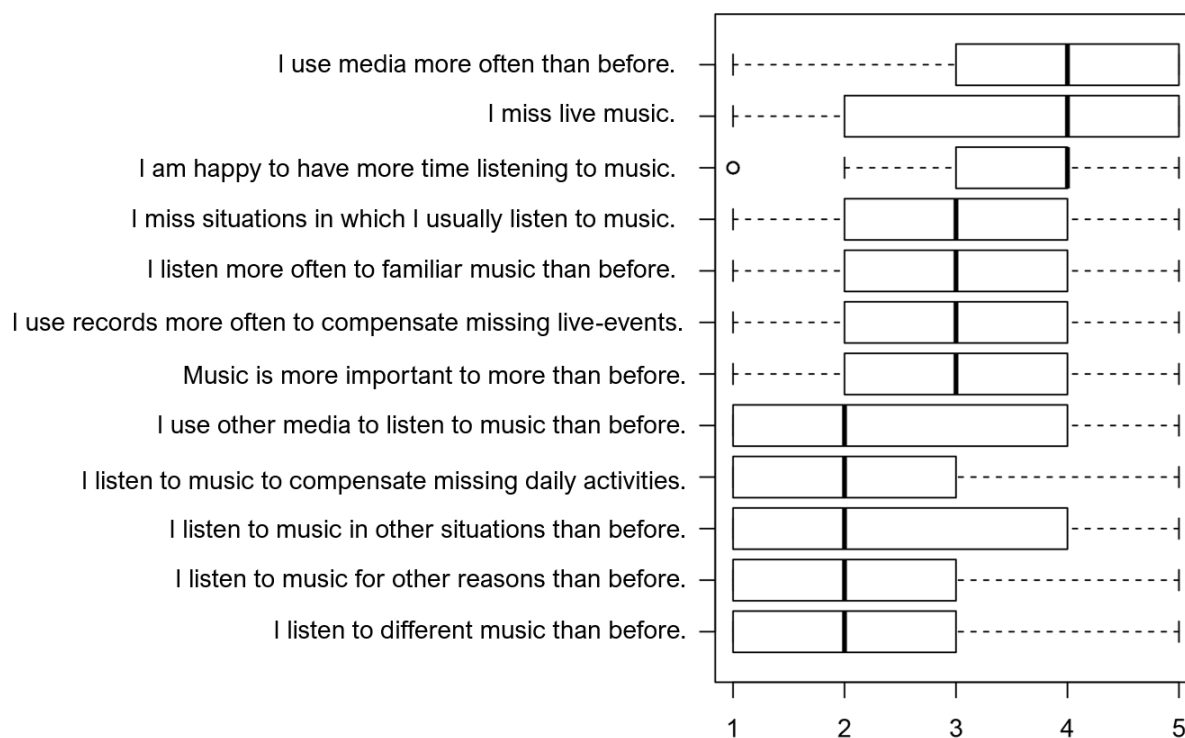

*Note. Scale: does not apply (1) – applies (5).*

**Table 3**

*Mean and SD for Items on Music Listening*

|    | variable       | n   | mean | sd   |
|----|----------------|-----|------|------|
| 1  | lm_comp        | 539 | 2.33 | 1.22 |
| 2  | lm_different   | 539 | 2.07 | 1.09 |
| 3  | lm_everyday    | 539 | 2.93 | 1.49 |
| 4  | lm_frequency   | 539 | 2.67 | 1.18 |
| 5  | lm_important   | 539 | 3.05 | 1.17 |
| 6  | lm_live        | 539 | 3.44 | 1.51 |
| 7  | lm_media_diff  | 539 | 2.48 | 1.27 |
| 8  | lm_media_frequ | 539 | 3.82 | 1.22 |
| 9  | lm_reasons     | 539 | 2.29 | 1.17 |
| 10 | lm_record      | 539 | 2.80 | 1.39 |
| 11 | lm_situation   | 539 | 2.54 | 1.27 |
| 12 | lm_zeit        | 539 | 3.48 | 1.25 |

## Factor Analyses Before Item Removal

### Worries

**Figure 4**

*Factor Structure of “Worries”*

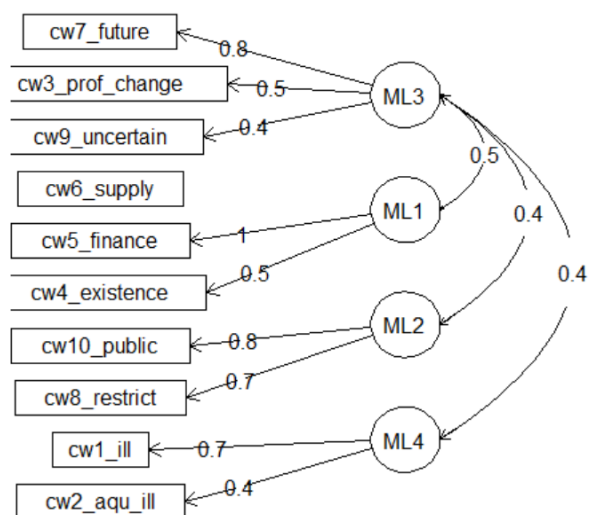

**Table 4**

*Factor Loadings for “Worries”*

Factor Analysis using method = ml  
 Call: psych::fa(r = c\_anx, nfactors = 4, rotate = "oblimin",  
 fm = "ml")  
 Standardized loadings (pattern matrix) based upon correlation matrix

|                 | ML3   | ML1   | ML2   | ML4   | h2   | u2    | com |
|-----------------|-------|-------|-------|-------|------|-------|-----|
| cw7_future      | 0.82  | -0.04 | 0.02  | 0.00  | 0.65 | 0.348 | 1.0 |
| cw3_prof_change | 0.51  | 0.23  | -0.01 | 0.01  | 0.43 | 0.567 | 1.4 |
| cw9_uncertain   | 0.44  | 0.02  | 0.32  | 0.20  | 0.56 | 0.443 | 2.3 |
| cw6_supply      | 0.23  | 0.16  | 0.08  | 0.21  | 0.25 | 0.748 | 3.1 |
| cw5_finance     | -0.03 | 0.96  | 0.03  | 0.00  | 0.92 | 0.085 | 1.0 |
| cw4_existence   | 0.39  | 0.48  | -0.08 | 0.03  | 0.55 | 0.454 | 2.0 |
| cw10_public     | -0.01 | 0.01  | 0.79  | -0.03 | 0.62 | 0.383 | 1.0 |
| cw8_restrict    | 0.00  | 0.02  | 0.67  | 0.00  | 0.46 | 0.542 | 1.0 |
| cw1_ill         | -0.02 | -0.01 | -0.03 | 0.71  | 0.48 | 0.517 | 1.0 |
| cw2_aqu_ill     | -0.07 | 0.00  | -0.02 | 0.44  | 0.17 | 0.826 | 1.1 |

**Table 5**

*Correlations of Factors “Worries”*

|     | ML3  | ML1  | ML2  | ML4  |
|-----|------|------|------|------|
| ML3 | 1.00 | 0.51 | 0.42 | 0.41 |
| ML1 | 0.51 | 1.00 | 0.20 | 0.25 |
| ML2 | 0.42 | 0.20 | 1.00 | 0.14 |
| ML4 | 0.41 | 0.25 | 0.14 | 1.00 |

*Note. The correlations refer to the factor analysis after removal of item cw6.*

## Everyday Life

**Figure 5**

*Factor Structure of “Everyday Life”*

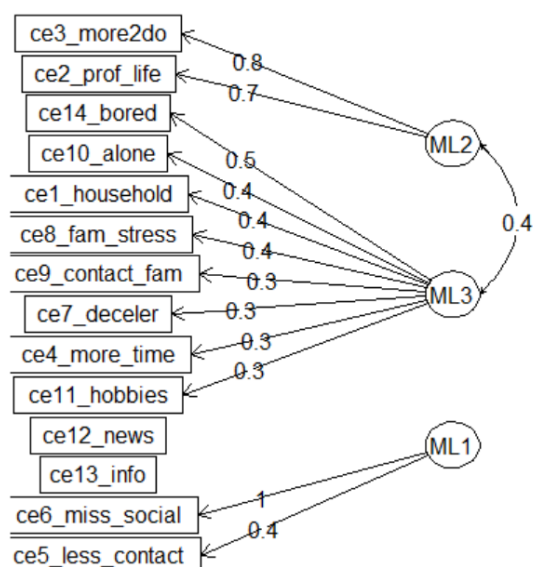

**Table 6**

*Factor Loadings for “Everyday Life”*

```

Factor Analysis using method = ml
Call: psych::fa(r = c_eve, nfactors = 3, rotate = "oblimin",
  fm = "ml")
Standardized loadings (pattern matrix) based upon correlation matrix

```

|                  | ML2   | ML3   | ML1   | h2    | u2    | com |
|------------------|-------|-------|-------|-------|-------|-----|
| ce3_more2do      | 0.84  | -0.03 | 0.00  | 0.683 | 0.317 | 1.0 |
| ce2_prof_life    | 0.67  | 0.07  | 0.02  | 0.492 | 0.508 | 1.0 |
| ce14_bored       | -0.09 | 0.46  | -0.03 | 0.180 | 0.820 | 1.1 |
| ce10_alone       | -0.06 | 0.44  | 0.03  | 0.179 | 0.821 | 1.0 |
| ce1_household    | -0.03 | 0.38  | 0.08  | 0.153 | 0.847 | 1.1 |
| ce8_fam_stress   | 0.16  | 0.37  | -0.04 | 0.206 | 0.794 | 1.4 |
| ce9_contact_fam  | -0.01 | 0.35  | 0.05  | 0.127 | 0.873 | 1.0 |
| ce7_deceler      | 0.07  | 0.33  | -0.04 | 0.126 | 0.874 | 1.1 |
| ce4_more_time    | 0.23  | 0.32  | 0.00  | 0.212 | 0.788 | 1.8 |
| ce11_hobbies     | 0.05  | 0.30  | 0.10  | 0.126 | 0.874 | 1.3 |
| ce12_news        | 0.10  | 0.29  | -0.06 | 0.113 | 0.887 | 1.3 |
| ce13_info        | 0.01  | 0.22  | 0.01  | 0.051 | 0.949 | 1.0 |
| ce6_miss_social  | 0.00  | 0.00  | 1.00  | 0.995 | 0.005 | 1.0 |
| ce5_less_contact | 0.09  | 0.09  | 0.39  | 0.194 | 0.806 | 1.2 |

**Table 7**

*Correlations of factors “Everyday Life”*

|     | ML1 | ML2 |
|-----|-----|-----|
| ML1 | 1.0 | 0.4 |
| ML2 | 0.4 | 1.0 |

*Note. The correlations refer to the factor analysis after removal of item cw6.*

# Results

## Factors Predicting Changes in Musical Behavior Before and During the Lockdown

**Table 8**

*Results of the Linear Models Predicting Changes in Functions of Music*

|                                          | <b>f intellectual</b> |               |              | <b>f involvement</b> |               |              |
|------------------------------------------|-----------------------|---------------|--------------|----------------------|---------------|--------------|
| <i>Predictors</i>                        | <i>Estimates</i>      | <i>CI</i>     | <i>p</i>     | <i>Estimates</i>     | <i>CI</i>     | <i>p</i>     |
| (Intercept)                              | -0.71                 | -1.45 – 0.04  | 0.064        | -0.04                | -0.45 – 0.36  | 0.830        |
| subsistence                              | -0.08                 | -0.18 – 0.02  | 0.125        | 0.03                 | -0.02 – 0.09  | 0.234        |
| uncertainty                              | 0.04                  | -0.10 – 0.19  | 0.552        | -0.06                | -0.14 – 0.02  | 0.118        |
| restrictions                             | 0.00                  | -0.10 – 0.11  | 0.936        | 0.02                 | -0.04 – 0.08  | 0.497        |
| sickness                                 | -0.01                 | -0.13 – 0.12  | 0.934        | 0.07                 | -0.00 – 0.13  | 0.051        |
| work                                     | -0.11                 | -0.21 – -0.00 | <b>0.042</b> | -0.06                | -0.12 – -0.00 | <b>0.034</b> |
| private                                  | 0.16                  | 0.05 – 0.28   | <b>0.006</b> | 0.04                 | -0.02 – 0.11  | 0.180        |
| p open minded                            | 0.08                  | -0.05 – 0.20  | 0.249        | -0.01                | -0.08 – 0.06  | 0.852        |
| p extraversion                           | -0.01                 | -0.14 – 0.12  | 0.875        | -0.01                | -0.08 – 0.06  | 0.719        |
| p negativity                             | 0.03                  | -0.11 – 0.17  | 0.713        | -0.03                | -0.11 – 0.04  | 0.416        |
| stress reactivity                        | 0.04                  | -0.02 – 0.10  | 0.182        | 0.03                 | -0.00 – 0.06  | 0.092        |
| stress workload                          | 0.01                  | -0.04 – 0.06  | 0.642        | -0.02                | -0.04 – 0.01  | 0.242        |
| Observations                             | 539                   |               |              | 539                  |               |              |
| R <sup>2</sup> / R <sup>2</sup> adjusted | 0.025 / 0.005         |               |              | 0.030 / 0.010        |               |              |

|                                          | <b>f synchronization</b> |               |              | <b>f killing time</b> |              |              |
|------------------------------------------|--------------------------|---------------|--------------|-----------------------|--------------|--------------|
| <i>Predictors</i>                        | <i>Estimates</i>         | <i>CI</i>     | <i>p</i>     | <i>Estimates</i>      | <i>CI</i>    | <i>p</i>     |
| (Intercept)                              | -0.47                    | -0.88 – -0.07 | <b>0.023</b> | -0.46                 | -0.96 – 0.05 | 0.075        |
| subsistence                              | 0.01                     | -0.04 – 0.07  | 0.668        | 0.00                  | -0.07 – 0.07 | 0.953        |
| uncertainty                              | -0.05                    | -0.12 – 0.03  | 0.240        | -0.03                 | -0.13 – 0.06 | 0.480        |
| restrictions                             | 0.01                     | -0.05 – 0.07  | 0.762        | 0.02                  | -0.05 – 0.09 | 0.561        |
| sickness                                 | -0.01                    | -0.07 – 0.06  | 0.841        | -0.00                 | -0.08 – 0.08 | 0.972        |
| work                                     | -0.01                    | -0.07 – 0.04  | 0.700        | -0.01                 | -0.08 – 0.06 | 0.804        |
| private                                  | 0.06                     | -0.01 – 0.12  | 0.088        | 0.07                  | -0.00 – 0.15 | 0.066        |
| p open minded                            | 0.06                     | -0.01 – 0.13  | 0.116        | 0.09                  | 0.01 – 0.18  | <b>0.034</b> |
| p extraversion                           | 0.01                     | -0.06 – 0.08  | 0.859        | 0.00                  | -0.09 – 0.09 | 0.972        |
| p negativity                             | -0.02                    | -0.09 – 0.06  | 0.646        | 0.06                  | -0.03 – 0.16 | 0.213        |
| stress reactivity                        | 0.01                     | -0.02 – 0.04  | 0.509        | -0.00                 | -0.04 – 0.04 | 0.966        |
| stress workload                          | 0.02                     | -0.01 – 0.04  | 0.226        | -0.00                 | -0.04 – 0.03 | 0.825        |
| Observations                             | 539                      |               |              | 539                   |              |              |
| R <sup>2</sup> / R <sup>2</sup> adjusted | 0.015 / -0.006           |               |              | 0.017 / -0.003        |              |              |

**Table 9***Results of the Linear Models Predicting Changes in Active Engagement with Music (Gold-MSI)*

|                                          | <b>m engagement</b> |              |          |
|------------------------------------------|---------------------|--------------|----------|
| <i>Predictors</i>                        | <i>Estimates</i>    | <i>CI</i>    | <i>p</i> |
| (Intercept)                              | -0.24               | -0.81 – 0.33 | 0.415    |
| subsistence                              | 0.06                | -0.02 – 0.13 | 0.148    |
| uncertainty                              | -0.03               | -0.13 – 0.08 | 0.650    |
| restrictions                             | 0.07                | -0.01 – 0.15 | 0.081    |
| sickness                                 | -0.03               | -0.13 – 0.06 | 0.495    |
| work                                     | 0.01                | -0.07 – 0.09 | 0.825    |
| private                                  | -0.02               | -0.11 – 0.07 | 0.703    |
| p open minded                            | -0.03               | -0.13 – 0.07 | 0.586    |
| p extraversion                           | -0.00               | -0.10 – 0.09 | 0.936    |
| p negativity                             | 0.05                | -0.06 – 0.16 | 0.362    |
| stress reactivity                        | -0.02               | -0.07 – 0.02 | 0.320    |
| stress workload                          | -0.01               | -0.05 – 0.03 | 0.638    |
| Observations                             | 539                 |              |          |
| R <sup>2</sup> / R <sup>2</sup> adjusted | 0.016 / -0.005      |              |          |
