# Supplementary material for: Consequences of the COVID-19 Lockdown in Germany: Effects of Changes in Daily Life on Musical Engagement and Functions of Music
Source: MDPI journal article supplement (doi:10.3390/ijerph181910463), 2021-10-05
Supplement: s1 [file s1]

# Musikhörverhalten in der Covid-19-Krise

Mit dieser Studie untersuchen wir das Musikhörverhalten während der Covid-19-Krise im Vergleich zum bisherigen Hörverhalten. Zuerst beantworten Sie bitte Fragen zu Ihrer allgemeinen Einstellung zu Musik und inwiefern sich Ihre Einstellung aktuell während der Covid-19-Krise ändert. Des Weiteren werden Ihnen Fragen zu Ihrer Persönlichkeit und Ihrem Umgang mit Stress im Alltag gestellt. Abschließend folgen allgemeine Fragen zu Ihrem Umgang mit der Covid-19-Krise und Ihrer Situation.

Kontakt für mögliche Nachfragen: [uk024755@student.uni-kassel.de](mailto:uk024755@student.uni-kassel.de)

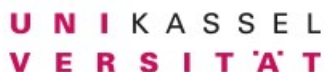

In dieser Umfrage sind 40 Fragen enthalten.

Welchem Geschlecht fühlen Sie sich zugehörig? \*

❗ Bitte wählen Sie eine der folgenden Antworten:

Bitte wählen Sie nur eine der folgenden Antworten aus:

- ☐ weiblich
- ☐ männlich
- ☐ divers

Wie alt sind Sie? \*

❗ In dieses Feld dürfen nur Zahlen eingegeben werden.

Bitte geben Sie Ihre Antwort hier ein:

### Welchen höchsten Bildungsabschluss haben Sie? \*

❶ Bitte wählen Sie eine der folgenden Antworten:

Bitte wählen Sie nur eine der folgenden Antworten aus:

- ☐ Ich bin derzeit Schüler/in, besuche eine allgemeinbildende Vollzeitschule
- ☐ kein Abschluss
- ☐ Hauptschulabschluss
- ☐ Mittlere Reife
- ☐ Fachhochschulreife
- ☐ Allgemeine Hochschulreife/ Abitur
- ☐ abgeschlossenes Studium
- ☐ Promotion
- ☐ sonstiges

### Welcher Tätigkeit gehen Sie zur Zeit nach? \*

❶ Bitte wählen Sie eine der folgenden Antworten:

Bitte wählen Sie nur eine der folgenden Antworten aus:

- ☐ Schüler/in
- ☐ Auszubildende/r
- ☐ Student/in
- ☐ Arbeiter/in oder Handwerker/in
- ☐ Angestellte/r
- ☐ leitende/r Angestellte/r
- ☐ selbstständig
- ☐ verbeamtet
- ☐ Rentner/in
- ☐ arbeitslos
- ☐ sonstiges

### Wieviele Personen leben in dem Haushalt, in dem Sie sich während der Covid-19-Krise hauptsächlich aufhalten? \*

❶ In dieses Feld dürfen nur Zahlen eingegeben werden.

Bitte geben Sie Ihre Antwort hier ein:

### In welcher Wohnform leben Sie zur Zeit der Covid-19-Krise hauptsächlich? \*

❗ Bitte wählen Sie eine der folgenden Antworten:

Bitte wählen Sie nur eine der folgenden Antworten aus:

- ☐ alleine
- ☐ mit Familie
- ☐ mit Partner/in
- ☐ in einer WG mit Freunden
- ☐ in einer "Zweck-WG"
- ☐ Anderes

Mit den folgenden Aussagen beschreiben Sie ihren aktuellen Umgang mit Musik seit Beginn der Ausgangsbeschränkungen in Ihrer Region.

### Wann begannen die Ausgangsbeschränkungen bei Ihnen? \*

❗ Bitte wählen Sie eine der folgenden Antworten:

Bitte wählen Sie nur eine der folgenden Antworten aus:

- ☐ am 23.03.2020
- ☐ am 16.03.2020
- ☐ vor dem 16.03.2020

☐ Sonstiges

## Seit Beginn der Ausgangsbeschränkungen ... \*

Bitte wählen Sie die zutreffende Antwort für jeden Punkt aus:

|                                                                                                        | <b>stimme<br/>überhaupt<br/>nicht zu</b> | <b>stimme<br/>eher nicht<br/>zu</b> | <b>teils, teils</b>   | <b>stimme<br/>eher zu</b> | <b>stimme voll<br/>und ganz zu</b> |
|--------------------------------------------------------------------------------------------------------|------------------------------------------|-------------------------------------|-----------------------|---------------------------|------------------------------------|
| ...ist mir Musik wichtiger.                                                                            | <input type="radio"/>                    | <input type="radio"/>               | <input type="radio"/> | <input type="radio"/>     | <input type="radio"/>              |
| ...freue ich mich, Zeit zum Musikhören zu haben.                                                       | <input type="radio"/>                    | <input type="radio"/>               | <input type="radio"/> | <input type="radio"/>     | <input type="radio"/>              |
| ...fehlt es mir, Live-Musik zu hören.                                                                  | <input type="radio"/>                    | <input type="radio"/>               | <input type="radio"/> | <input type="radio"/>     | <input type="radio"/>              |
| ...greife ich öfter auf Aufnahme zurück, da ich keine Live-Musik hören kann.                           | <input type="radio"/>                    | <input type="radio"/>               | <input type="radio"/> | <input type="radio"/>     | <input type="radio"/>              |
| ... höre ich andere Musik als vorher.                                                                  | <input type="radio"/>                    | <input type="radio"/>               | <input type="radio"/> | <input type="radio"/>     | <input type="radio"/>              |
| ...höre ich häufiger mir bekannte Musik als vorher.                                                    | <input type="radio"/>                    | <input type="radio"/>               | <input type="radio"/> | <input type="radio"/>     | <input type="radio"/>              |
| ...höre ich aus anderen Gründen Musik als vorher.                                                      | <input type="radio"/>                    | <input type="radio"/>               | <input type="radio"/> | <input type="radio"/>     | <input type="radio"/>              |
| ...höre ich in anderen Situationen Musik als vorher.                                                   | <input type="radio"/>                    | <input type="radio"/>               | <input type="radio"/> | <input type="radio"/>     | <input type="radio"/>              |
| ...fehlen mir Situationen im Alltag, in denen ich sonst Musik hören würde (Weg zur Arbeit, Sport,...). | <input type="radio"/>                    | <input type="radio"/>               | <input type="radio"/> | <input type="radio"/>     | <input type="radio"/>              |
| ...höre ich Musik zur Kompensation fehlender Alltagsbeschäftigungen.                                   | <input type="radio"/>                    | <input type="radio"/>               | <input type="radio"/> | <input type="radio"/>     | <input type="radio"/>              |
| ...nutze ich Medien häufiger als vorher.                                                               | <input type="radio"/>                    | <input type="radio"/>               | <input type="radio"/> | <input type="radio"/>     | <input type="radio"/>              |
| ...nutze ich andere Medien, um Musik zu hören als vorher.                                              | <input type="radio"/>                    | <input type="radio"/>               | <input type="radio"/> | <input type="radio"/>     | <input type="radio"/>              |

Wie gut stimmen Sie den Aussagen zu, mit denen Sie Ihr **normales Verhalten (also vor der Covid-19-Krise)** beschreiben? \*

Bitte wählen Sie die zutreffende Antwort für jeden Punkt aus:

|                                                                                                                      | Stimme<br>ganz<br>und gar<br>nicht zu | Stimme<br>nicht zu    | Stimme<br>eher<br>nicht zu | Weder<br>noch         | Stimme<br>eher zu     | Stimme<br>zu          | Stimme<br>voll und<br>ganz zu |
|----------------------------------------------------------------------------------------------------------------------|---------------------------------------|-----------------------|----------------------------|-----------------------|-----------------------|-----------------------|-------------------------------|
| Ich beschäftige mich normalerweise in meiner Freizeit viel mit musikbezogenen Aktivitäten.                           | <input type="radio"/>                 | <input type="radio"/> | <input type="radio"/>      | <input type="radio"/> | <input type="radio"/> | <input type="radio"/> | <input type="radio"/>         |
| Ich schreibe normalerweise gerne über Musik, z.B. in Internetblogs und Foren.                                        | <input type="radio"/>                 | <input type="radio"/> | <input type="radio"/>      | <input type="radio"/> | <input type="radio"/> | <input type="radio"/> | <input type="radio"/>         |
| Ich bin normalerweise fasziniert von Musikstilen, mit denen ich nicht vertraut bin und möchte mehr darüber erfahren. | <input type="radio"/>                 | <input type="radio"/> | <input type="radio"/>      | <input type="radio"/> | <input type="radio"/> | <input type="radio"/> | <input type="radio"/>         |
| Ich lese und suche normalerweise oft im Internet nach Dingen, die mit Musik zu tun haben.                            | <input type="radio"/>                 | <input type="radio"/> | <input type="radio"/>      | <input type="radio"/> | <input type="radio"/> | <input type="radio"/> | <input type="radio"/>         |
| Ich gebe normalerweise nicht viel Geld meines verfügbaren Einkommens für Musik aus.                                  | <input type="radio"/>                 | <input type="radio"/> | <input type="radio"/>      | <input type="radio"/> | <input type="radio"/> | <input type="radio"/> | <input type="radio"/>         |
| Musik ist normalerweise eine Art von Sucht- ohne sie könnte ich nicht leben.                                         | <input type="radio"/>                 | <input type="radio"/> | <input type="radio"/>      | <input type="radio"/> | <input type="radio"/> | <input type="radio"/> | <input type="radio"/>         |
| Ich halte mich normalerweise auf dem Laufenden was neue Musik angeht (z.B. neue Künstler oder Aufnahmen).            | <input type="radio"/>                 | <input type="radio"/> | <input type="radio"/>      | <input type="radio"/> | <input type="radio"/> | <input type="radio"/> | <input type="radio"/>         |

Ich habe \_\_\_\_ Live-Events als Zuschauer innerhalb der letzten 12 Monate besucht. \*

❗ Bitte wählen Sie eine der folgenden Antworten:

Bitte wählen Sie nur eine der folgenden Antworten aus:

- ☐ 0
- ☐ 1
- ☐ 2
- ☐ 3
- ☐ 4-6
- ☐ 7-10
- ☐ 11 oder mehr

Ich höre **normalerweise** jeden Tag aufmerksam Musik für \_\_\_\_ \*

❗ Bitte wählen Sie eine der folgenden Antworten:

Bitte wählen Sie nur eine der folgenden Antworten aus:

- ☐ 0-15 Minuten
- ☐ 15-30 Minuten
- ☐ 30-60 Minuten
- ☐ 60-90 Minuten
- ☐ 2 Stunden
- ☐ 2-3 Stunden
- ☐ 4 Stunden oder mehr

## Welche Musikrichtungen hören Sie **normalerweise** hauptsächlich? \*

❗ Bitte wählen Sie die zutreffenden Antworten aus:

Bitte wählen Sie alle zutreffenden Antworten aus:

☐ Hip-Hop/Rap

☐ Pop

☐ Jazz

☐ Klassik

☐ Rock

☐ Metal

☐ R&B

☐ Soul

☐ Schlager

☐ Elektro

☐ K-Pop

☐ Deutschrap

☐ Mainstream

☐ House

☐ Dubstep

☐ Reggae

☐ Neue Musik

☐ Salsa/Latin

☐ Sonstiges:

Die Musik, welche ich **normalerweise** höre, ist ... \*

Bitte wählen Sie die zutreffende Antwort für jeden Punkt aus:

|                     | <b>stimme<br/>nicht zu</b> | <b>stimme<br/>eher nicht<br/>zu</b> | <b>teils, teils</b>   | <b>stimme<br/>eher zu</b> | <b>stimme zu</b>      |
|---------------------|----------------------------|-------------------------------------|-----------------------|---------------------------|-----------------------|
| <b>entspannend</b>  | <input type="radio"/>      | <input type="radio"/>               | <input type="radio"/> | <input type="radio"/>     | <input type="radio"/> |
| <b>gefühlbetont</b> | <input type="radio"/>      | <input type="radio"/>               | <input type="radio"/> | <input type="radio"/>     | <input type="radio"/> |
| <b>energievoll</b>  | <input type="radio"/>      | <input type="radio"/>               | <input type="radio"/> | <input type="radio"/>     | <input type="radio"/> |
| <b>aufmunternd</b>  | <input type="radio"/>      | <input type="radio"/>               | <input type="radio"/> | <input type="radio"/>     | <input type="radio"/> |
| <b>nachdenklich</b> | <input type="radio"/>      | <input type="radio"/>               | <input type="radio"/> | <input type="radio"/>     | <input type="radio"/> |
| <b>düster</b>       | <input type="radio"/>      | <input type="radio"/>               | <input type="radio"/> | <input type="radio"/>     | <input type="radio"/> |
| <b>fröhlich</b>     | <input type="radio"/>      | <input type="radio"/>               | <input type="radio"/> | <input type="radio"/>     | <input type="radio"/> |
| <b>geistreich</b>   | <input type="radio"/>      | <input type="radio"/>               | <input type="radio"/> | <input type="radio"/>     | <input type="radio"/> |
| <b>schnell</b>      | <input type="radio"/>      | <input type="radio"/>               | <input type="radio"/> | <input type="radio"/>     | <input type="radio"/> |
| <b>rhythmisch</b>   | <input type="radio"/>      | <input type="radio"/>               | <input type="radio"/> | <input type="radio"/>     | <input type="radio"/> |
| <b>mit Gesang</b>   | <input type="radio"/>      | <input type="radio"/>               | <input type="radio"/> | <input type="radio"/>     | <input type="radio"/> |



Ich höre **normalerweise** Musik, weil... \*

Bitte wählen Sie die zutreffende Antwort für jeden Punkt aus:

|                                                                                             | trifft nicht<br>zu    | trifft eher<br>nicht zu | teils, teils          | trifft eher zu        | trifft zu             |
|---------------------------------------------------------------------------------------------|-----------------------|-------------------------|-----------------------|-----------------------|-----------------------|
| sie eine intellektuelle<br>Stimulation für mich ist.                                        | <input type="radio"/> | <input type="radio"/>   | <input type="radio"/> | <input type="radio"/> | <input type="radio"/> |
| sie mich an bestimmte<br>Phasen meines Lebens bzw.<br>an vergangene Ereignisse<br>erinnert. | <input type="radio"/> | <input type="radio"/>   | <input type="radio"/> | <input type="radio"/> | <input type="radio"/> |
| ich darin meine Gefühle und<br>Stimmungen wiederfinde.                                      | <input type="radio"/> | <input type="radio"/>   | <input type="radio"/> | <input type="radio"/> | <input type="radio"/> |
| mir dann tolle Bilder oder<br>Geschichten in den Kopf<br>kommen.                            | <input type="radio"/> | <input type="radio"/>   | <input type="radio"/> | <input type="radio"/> | <input type="radio"/> |
| ich dann Gänsehaut<br>bekomme.                                                              | <input type="radio"/> | <input type="radio"/>   | <input type="radio"/> | <input type="radio"/> | <input type="radio"/> |
| ich dann die Welt um mich<br>herum vergessen kann.                                          | <input type="radio"/> | <input type="radio"/>   | <input type="radio"/> | <input type="radio"/> | <input type="radio"/> |
| ich mich dann fitter fühle.                                                                 | <input type="radio"/> | <input type="radio"/>   | <input type="radio"/> | <input type="radio"/> | <input type="radio"/> |
| ich mich dazu bewegen kann.                                                                 | <input type="radio"/> | <input type="radio"/>   | <input type="radio"/> | <input type="radio"/> | <input type="radio"/> |
| ich dadurch Dampf ablassen<br>kann.                                                         | <input type="radio"/> | <input type="radio"/>   | <input type="radio"/> | <input type="radio"/> | <input type="radio"/> |
| ich dabei mitsingen oder<br>mitsummen kann.                                                 | <input type="radio"/> | <input type="radio"/>   | <input type="radio"/> | <input type="radio"/> | <input type="radio"/> |
| sie meinen Stress reduziert.                                                                | <input type="radio"/> | <input type="radio"/>   | <input type="radio"/> | <input type="radio"/> | <input type="radio"/> |
| ich damit Zeit totschlagen<br>kann.                                                         | <input type="radio"/> | <input type="radio"/>   | <input type="radio"/> | <input type="radio"/> | <input type="radio"/> |
| ich sie im Hintergrund<br>brauche, während ich etwas<br>anderes tue.                        | <input type="radio"/> | <input type="radio"/>   | <input type="radio"/> | <input type="radio"/> | <input type="radio"/> |
| ich mich dann weniger<br>einsam fühle.                                                      | <input type="radio"/> | <input type="radio"/>   | <input type="radio"/> | <input type="radio"/> | <input type="radio"/> |

Nun geben Sie bitte an, inwiefern die folgenden Aussagen **im Moment (also während der Covid-19-Krise)** auf Sie zutreffen? \*

Bitte wählen Sie die zutreffende Antwort für jeden Punkt aus:

|                                                                                                                | Stimme<br>ganz<br>und gar<br>nicht zu | Stimme<br>nicht zu    | Stimme<br>eher<br>nicht zu | Weder<br>noch         | Stimme<br>eher zu     | Stimme<br>zu          | Stimme<br>voll und<br>ganz zu |
|----------------------------------------------------------------------------------------------------------------|---------------------------------------|-----------------------|----------------------------|-----------------------|-----------------------|-----------------------|-------------------------------|
| Ich beschäftige mich aktuell in meiner Freizeit viel mit musikbezogenen Aktivitäten.                           | <input type="radio"/>                 | <input type="radio"/> | <input type="radio"/>      | <input type="radio"/> | <input type="radio"/> | <input type="radio"/> | <input type="radio"/>         |
| Ich schreibe aktuell gerne über Musik.                                                                         | <input type="radio"/>                 | <input type="radio"/> | <input type="radio"/>      | <input type="radio"/> | <input type="radio"/> | <input type="radio"/> | <input type="radio"/>         |
| Ich bin aktuell fasziniert von Musikstilen, mit denen ich nicht vertraut bin und möchte mehr darüber erfahren. | <input type="radio"/>                 | <input type="radio"/> | <input type="radio"/>      | <input type="radio"/> | <input type="radio"/> | <input type="radio"/> | <input type="radio"/>         |
| Ich lese und suche aktuell oft im Internet nach Dingen, die mit Musik zu tun haben.                            | <input type="radio"/>                 | <input type="radio"/> | <input type="radio"/>      | <input type="radio"/> | <input type="radio"/> | <input type="radio"/> | <input type="radio"/>         |
| Ich gebe aktuell nicht viel Geld meines verfügbaren Einkommens für Musik aus.                                  | <input type="radio"/>                 | <input type="radio"/> | <input type="radio"/>      | <input type="radio"/> | <input type="radio"/> | <input type="radio"/> | <input type="radio"/>         |
| Musik ist aktuell für mich eine Art von Sucht - ohne sie könnte ich nicht Leben.                               | <input type="radio"/>                 | <input type="radio"/> | <input type="radio"/>      | <input type="radio"/> | <input type="radio"/> | <input type="radio"/> | <input type="radio"/>         |
| Ich halte mich aktuell auf dem Laufenden was neue Musik angeht (z.B. neue Künstler oder Aufnahmen)             | <input type="radio"/>                 | <input type="radio"/> | <input type="radio"/>      | <input type="radio"/> | <input type="radio"/> | <input type="radio"/> | <input type="radio"/>         |

Ich höre **aktuell** jeden Tag aufmerksam Musik für \_\_\_\_\_. \*

❗ Bitte wählen Sie eine der folgenden Antworten:

Bitte wählen Sie nur eine der folgenden Antworten aus:

- ☐ 0-15 Minuten
- ☐ 15-30 Minuten
- ☐ 30-60 Minuten
- ☐ 60-90 Minuten
- ☐ 2 Stunden
- ☐ 2-3 Stunden
- ☐ 4 Stunden oder mehr

Welche Musikrichtungen hören Sie **aktuell** hauptsächlich? \*

❗ Bitte wählen Sie die zutreffenden Antworten aus:

Bitte wählen Sie alle zutreffenden Antworten aus:

- ☐ Hip-Hop/Rap
- ☐ Pop
- ☐ Jazz
- ☐ Klassik
- ☐ Rock
- ☐ Metal
- ☐ R&B
- ☐ Soul
- ☐ Schlager
- ☐ Elektro
- ☐ K-Pop
- ☐ Deutschrap
- ☐ Mainstream
- ☐ House
- ☐ Dubstep
- ☐ Reggae
- ☐ Neue Musik
- ☐ Salsa/Latin

☐ Sonstiges:

Die Musik, welche ich **aktuell** höre, ist ... \*

Bitte wählen Sie die zutreffende Antwort für jeden Punkt aus:

|                     | <b>stimme<br/>nicht zu</b> | <b>stimme<br/>eher nicht<br/>zu</b> | <b>teils, teils</b>   | <b>stimme<br/>eher zu</b> | <b>stimme zu</b>      |
|---------------------|----------------------------|-------------------------------------|-----------------------|---------------------------|-----------------------|
| <b>entspannend</b>  | <input type="radio"/>      | <input type="radio"/>               | <input type="radio"/> | <input type="radio"/>     | <input type="radio"/> |
| <b>gefühlbetont</b> | <input type="radio"/>      | <input type="radio"/>               | <input type="radio"/> | <input type="radio"/>     | <input type="radio"/> |
| <b>energievoll</b>  | <input type="radio"/>      | <input type="radio"/>               | <input type="radio"/> | <input type="radio"/>     | <input type="radio"/> |
| <b>aufmunternd</b>  | <input type="radio"/>      | <input type="radio"/>               | <input type="radio"/> | <input type="radio"/>     | <input type="radio"/> |
| <b>nachdenklich</b> | <input type="radio"/>      | <input type="radio"/>               | <input type="radio"/> | <input type="radio"/>     | <input type="radio"/> |
| <b>düster</b>       | <input type="radio"/>      | <input type="radio"/>               | <input type="radio"/> | <input type="radio"/>     | <input type="radio"/> |
| <b>fröhlich</b>     | <input type="radio"/>      | <input type="radio"/>               | <input type="radio"/> | <input type="radio"/>     | <input type="radio"/> |
| <b>geistreich</b>   | <input type="radio"/>      | <input type="radio"/>               | <input type="radio"/> | <input type="radio"/>     | <input type="radio"/> |
| <b>schnell</b>      | <input type="radio"/>      | <input type="radio"/>               | <input type="radio"/> | <input type="radio"/>     | <input type="radio"/> |
| <b>rhythmisch</b>   | <input type="radio"/>      | <input type="radio"/>               | <input type="radio"/> | <input type="radio"/>     | <input type="radio"/> |
| <b>mit Gesang</b>   | <input type="radio"/>      | <input type="radio"/>               | <input type="radio"/> | <input type="radio"/>     | <input type="radio"/> |

Ich höre **aktuell** Musik, weil... \*

Bitte wählen Sie die zutreffende Antwort für jeden Punkt aus:

|                                                                                    | trifft nicht zu       | trifft eher nicht zu  | teils, teils          | trifft eher zu        | trifft zu             |
|------------------------------------------------------------------------------------|-----------------------|-----------------------|-----------------------|-----------------------|-----------------------|
| sie eine intellektuelle Stimulation für mich ist.                                  | <input type="radio"/> |
| sie mich an bestimmte Phasen meines Lebens bzw. an vergangene Ereignisse erinnert. | <input type="radio"/> |
| ich darin meine Gefühle und Stimmungen wiederfinde.                                | <input type="radio"/> |
| mir dann tolle Bilder oder Geschichten in den Kopf kommen.                         | <input type="radio"/> |
| ich dann Gänsehaut bekomme.                                                        | <input type="radio"/> |
| ich dadurch die Welt besser verstehen kann.                                        | <input type="radio"/> |
| ich dann die Welt um mich herum vergessen kann.                                    | <input type="radio"/> |
| ich mich dann fitter fühle.                                                        | <input type="radio"/> |
| ich mich dazu bewegen kann.                                                        | <input type="radio"/> |
| sie meine Stimmung verbessern kann.                                                | <input type="radio"/> |
| ich dadurch Dampf ablassen kann.                                                   | <input type="radio"/> |
| ich dabei mitsingen oder mitsummen kann.                                           | <input type="radio"/> |
| sie meinen Stress reduziert.                                                       | <input type="radio"/> |
| ich damit die Zeit totschlagen kann.                                               | <input type="radio"/> |
| ich sie im Hintergrund brauche, während ich etwas anderes tue.                     | <input type="radio"/> |
| ich mich dann weniger einsam fühle.                                                | <input type="radio"/> |

Nachstehend finden sie eine Reihe von Eigenschaften, die auf Sie zutreffen können. Würden Sie über sich z.B. sagen, dass sie gerne Zeit mit anderen Menschen verbringen? Bitte geben Sie für jede der folgenden Aussagen an, inwieweit Sie zustimmen. \*

Bitte wählen Sie die zutreffende Antwort für jeden Punkt aus:

|                                                                           | <b>stimme<br/>überhaupt<br/>nicht zu</b> | <b>stimme<br/>eher nicht<br/>zu</b> | <b>teils,teils</b>    | <b>stimme<br/>eher zu</b> | <b>stimme voll<br/>und ganz zu</b> |
|---------------------------------------------------------------------------|------------------------------------------|-------------------------------------|-----------------------|---------------------------|------------------------------------|
| <b>Ich gehe aus mir heraus, bin<br/>gesellig.</b>                         | <input type="radio"/>                    | <input type="radio"/>               | <input type="radio"/> | <input type="radio"/>     | <input type="radio"/>              |
| <b>Ich bleibe auch in stressigen<br/>Situationen gelassen.</b>            | <input type="radio"/>                    | <input type="radio"/>               | <input type="radio"/> | <input type="radio"/>     | <input type="radio"/>              |
| <b>Ich bin nicht sonderlich<br/>kunstinteressiert.</b>                    | <input type="radio"/>                    | <input type="radio"/>               | <input type="radio"/> | <input type="radio"/>     | <input type="radio"/>              |
| <b>Ich bin durchsetzungsfähig,<br/>energisch.</b>                         | <input type="radio"/>                    | <input type="radio"/>               | <input type="radio"/> | <input type="radio"/>     | <input type="radio"/>              |
| <b>Ich bleibe auch bei<br/>Rückschlägen zuversichtlich.</b>               | <input type="radio"/>                    | <input type="radio"/>               | <input type="radio"/> | <input type="radio"/>     | <input type="radio"/>              |
| <b>Ich bin vielseitig interessiert.</b>                                   | <input type="radio"/>                    | <input type="radio"/>               | <input type="radio"/> | <input type="radio"/>     | <input type="radio"/>              |
| <b>Ich schäume selten vor<br/>Begeisterung über.</b>                      | <input type="radio"/>                    | <input type="radio"/>               | <input type="radio"/> | <input type="radio"/>     | <input type="radio"/>              |
| <b>Ich kann launisch sein, habe<br/>schwankende Stimmungen.</b>           | <input type="radio"/>                    | <input type="radio"/>               | <input type="radio"/> | <input type="radio"/>     | <input type="radio"/>              |
| <b>Ich bin erfinderisch, mir<br/>fallen raffinierte Lösungen<br/>ein.</b> | <input type="radio"/>                    | <input type="radio"/>               | <input type="radio"/> | <input type="radio"/>     | <input type="radio"/>              |
| <b>Ich bin eher ruhig.</b>                                                | <input type="radio"/>                    | <input type="radio"/>               | <input type="radio"/> | <input type="radio"/>     | <input type="radio"/>              |
| <b>Ich reagiere leicht<br/>angespannt.</b>                                | <input type="radio"/>                    | <input type="radio"/>               | <input type="radio"/> | <input type="radio"/>     | <input type="radio"/>              |
| <b>Ich kann mich für Kunst,<br/>Musik und Literatur<br/>begeistern.</b>   | <input type="radio"/>                    | <input type="radio"/>               | <input type="radio"/> | <input type="radio"/>     | <input type="radio"/>              |
| <b>Ich neige dazu, die Führung<br/>zu übernehmen.</b>                     | <input type="radio"/>                    | <input type="radio"/>               | <input type="radio"/> | <input type="radio"/>     | <input type="radio"/>              |
| <b>Ich bin selbstsicher, mit mir<br/>zufrieden.</b>                       | <input type="radio"/>                    | <input type="radio"/>               | <input type="radio"/> | <input type="radio"/>     | <input type="radio"/>              |
| <b>Ich meide philosophische<br/>Diskussionen.</b>                         | <input type="radio"/>                    | <input type="radio"/>               | <input type="radio"/> | <input type="radio"/>     | <input type="radio"/>              |
| <b>Ich bin weniger aktiv und<br/>unternehmungslustig als<br/>andere.</b>  | <input type="radio"/>                    | <input type="radio"/>               | <input type="radio"/> | <input type="radio"/>     | <input type="radio"/>              |

|                                                                                            | <b>stimme<br/>überhaupt<br/>nicht zu</b> | <b>stimme eher<br/>nicht zu</b> | <b>teils,teils</b>    | <b>stimme eher<br/>zu</b> | <b>stimme voll<br/>und ganz zu</b> |
|--------------------------------------------------------------------------------------------|------------------------------------------|---------------------------------|-----------------------|---------------------------|------------------------------------|
| <b>Ich bin ausgeglichen, nicht leicht aus der Ruhe zu bringen.</b>                         | <input type="radio"/>                    | <input type="radio"/>           | <input type="radio"/> | <input type="radio"/>     | <input type="radio"/>              |
| <b>Ich bin nicht besonders einfallsreich.</b>                                              | <input type="radio"/>                    | <input type="radio"/>           | <input type="radio"/> | <input type="radio"/>     | <input type="radio"/>              |
| <b>Ich bin eher schüchtern.</b>                                                            | <input type="radio"/>                    | <input type="radio"/>           | <input type="radio"/> | <input type="radio"/>     | <input type="radio"/>              |
| <b>Ich mache mir oft Sorgen.</b>                                                           | <input type="radio"/>                    | <input type="radio"/>           | <input type="radio"/> | <input type="radio"/>     | <input type="radio"/>              |
| <b>Ich weiß Kunst und Schönheit zu schätzen.</b>                                           | <input type="radio"/>                    | <input type="radio"/>           | <input type="radio"/> | <input type="radio"/>     | <input type="radio"/>              |
| <b>Mir fällt es schwer, andere zu beeinflussen.</b>                                        | <input type="radio"/>                    | <input type="radio"/>           | <input type="radio"/> | <input type="radio"/>     | <input type="radio"/>              |
| <b>Ich fühle mich oft bedrückt, freudlos.</b>                                              | <input type="radio"/>                    | <input type="radio"/>           | <input type="radio"/> | <input type="radio"/>     | <input type="radio"/>              |
| <b>Es macht mir Spaß, gründlich über komplexe Dinge nachzudenken und sie zu verstehen.</b> | <input type="radio"/>                    | <input type="radio"/>           | <input type="radio"/> | <input type="radio"/>     | <input type="radio"/>              |
| <b>Ich bin voller Energie und Tatendrang.</b>                                              | <input type="radio"/>                    | <input type="radio"/>           | <input type="radio"/> | <input type="radio"/>     | <input type="radio"/>              |
| <b>Ich habe meine Gefühle unter Kontrolle, werde selten wütend.</b>                        | <input type="radio"/>                    | <input type="radio"/>           | <input type="radio"/> | <input type="radio"/>     | <input type="radio"/>              |
| <b>Ich bin nicht sonderlich fantasievoll.</b>                                              | <input type="radio"/>                    | <input type="radio"/>           | <input type="radio"/> | <input type="radio"/>     | <input type="radio"/>              |
| <b>Ich bin gesprächig.</b>                                                                 | <input type="radio"/>                    | <input type="radio"/>           | <input type="radio"/> | <input type="radio"/>     | <input type="radio"/>              |

Dieser Test fragt nach Ihren typischen Reaktionen auf Situationen, die Sie bestimmt schon erlebt haben. Es werden jeweils drei Antworten vorgeschlagen. Bitte kreuzen Sie die Reaktion an, die Sie normalerweise bei sich beobachten. Wenn Sie unsicher sind, entscheiden Sie sich für die Antwort, die für Sie am ehesten zutrifft. Lassen Sie bitte keine Frage aus, auch wenn es Ihnen manchmal schwer fällt, sich zu entscheiden.

Wenn sich Aufgaben so häufen, dass sie kaum zu schaffen sind, ... \*

❶ Bitte wählen Sie eine der folgenden Antworten:

Bitte wählen Sie nur eine der folgenden Antworten aus:

- ☐ lasse ich mich im Allgemeinen nicht aus dem Gleichgewicht bringen.
- ☐ werde ich meist etwas unruhig.
- ☐ werde ich gewöhnlich ziemlich nervös.

Wenn ich nach einem anstrengenden Arbeitstag ausspannen möchte, ... \*

❗ Bitte wählen Sie eine der folgenden Antworten:

Bitte wählen Sie nur eine der folgenden Antworten aus:

- ☐ fällt mir das meist ziemlich schwer.
- ☐ gelingt mir das meist einigermaßen.
- ☐ habe ich damit im Allgemeinen keine Probleme.

Wenn ich für meine Arbeit wenig Zeit habe, ... \*

❗ Bitte wählen Sie eine der folgenden Antworten:

Bitte wählen Sie nur eine der folgenden Antworten aus:

- ☐ bleibe ich meist ruhig.
- ☐ werde ich meist unruhig.
- ☐ werde ich meist ziemlich hektisch.

Wenn ich nach anstrengender Arbeit Freizeit habe, ... \*

❗ Bitte wählen Sie eine der folgenden Antworten:

Bitte wählen Sie nur eine der folgenden Antworten aus:

- ☐ fällt es mir oft schwer, abzuschalten und mich zu entspannen.
- ☐ braucht es meist einige Zeit, bis ich richtig abschalten kann.
- ☐ kann ich meist gut abschalten und die Probleme des Tages vergessen.

Wenn etwas nicht so läuft, wie ich es mir vorgestellt habe, ... \*

❗ Bitte wählen Sie eine der folgenden Antworten:

Bitte wählen Sie nur eine der folgenden Antworten aus:

- ☐ bleibe ich meist gelassen.
- ☐ werde ich oft ungeduldig.
- ☐ könnte ich meist aus der Haut fahren.



**Wenn ich viele Aufgaben auf einmal zu erledigen habe, ... \***

❗ Bitte wählen Sie eine der folgenden Antworten:

Bitte wählen Sie nur eine der folgenden Antworten aus:

- ☐ bleibe ich im Allgemeinen gelassen und mache eines nach dem anderen.
- ☐ werde ich meist ungeduldig, mir geht alles nicht schnell genug.
- ☐ machen mich meist schon kleine Störungen nervös.

**Wenn ich unter Stress stehe, ... \***

❗ Bitte wählen Sie eine der folgenden Antworten:

Bitte wählen Sie nur eine der folgenden Antworten aus:

- ☐ kann ich die verbleibende Freizeit meist gar nicht mehr genießen.
- ☐ kann ich die verbleibende Freizeit meist nicht mehr richtig genießen.
- ☐ kann ich die verbleibende Freizeit meist trotzdem genießen.

**Wenn sich Aufgaben so häufen, dass sie kaum zu bewältigen sind, ... \***

❗ Bitte wählen Sie eine der folgenden Antworten:

Bitte wählen Sie nur eine der folgenden Antworten aus:

- ☐ ist mein Schlaf wie immer.
- ☐ schlafe ich unruhiger als sonst.
- ☐ ist mein Schlaf deutlich schlechter.

**Wenn ich sehr viele Verpflichtungen/Aufgaben zu erfüllen habe, ... \***

❗ Bitte wählen Sie eine der folgenden Antworten:

Bitte wählen Sie nur eine der folgenden Antworten aus:

- ☐ bleibe ich im Allgemeinen gelassen.
- ☐ werde ich meist ziemlich ungeduldig.
- ☐ werde ich oft richtig hektisch.

Wenn ich nach einem anstrengenden Arbeitstag ausspannen möchte, ... \*

❶ Bitte wählen Sie eine der folgenden Antworten:

Bitte wählen Sie nur eine der folgenden Antworten aus:

- ☐ fällt mir das meist ziemlich schwer.
- ☐ gelingt mir das meist einigermaßen.
- ☐ habe ich damit im Allgemeinen keine Probleme.

Wie fühlten Sie sich in den letzten Tagen? \*

Bitte wählen Sie die zutreffende Antwort für jeden Punkt aus:

|                       | <b>ganz<br/>wenig/gar<br/>nicht</b> | <b>ein<br/>bisschen</b> | <b>einigermaßen</b>   | <b>erheblich</b>      | <b>äußerst</b>        |
|-----------------------|-------------------------------------|-------------------------|-----------------------|-----------------------|-----------------------|
| <b>zufrieden</b>      | <input type="radio"/>               | <input type="radio"/>   | <input type="radio"/> | <input type="radio"/> | <input type="radio"/> |
| <b>energiegeladen</b> | <input type="radio"/>               | <input type="radio"/>   | <input type="radio"/> | <input type="radio"/> | <input type="radio"/> |
| <b>gestresst</b>      | <input type="radio"/>               | <input type="radio"/>   | <input type="radio"/> | <input type="radio"/> | <input type="radio"/> |
| <b>müde</b>           | <input type="radio"/>               | <input type="radio"/>   | <input type="radio"/> | <input type="radio"/> | <input type="radio"/> |
| <b>friedlich</b>      | <input type="radio"/>               | <input type="radio"/>   | <input type="radio"/> | <input type="radio"/> | <input type="radio"/> |
| <b>unglücklich</b>    | <input type="radio"/>               | <input type="radio"/>   | <input type="radio"/> | <input type="radio"/> | <input type="radio"/> |
| <b>lustlos</b>        | <input type="radio"/>               | <input type="radio"/>   | <input type="radio"/> | <input type="radio"/> | <input type="radio"/> |
| <b>ruhig</b>          | <input type="radio"/>               | <input type="radio"/>   | <input type="radio"/> | <input type="radio"/> | <input type="radio"/> |
| <b>begeistert</b>     | <input type="radio"/>               | <input type="radio"/>   | <input type="radio"/> | <input type="radio"/> | <input type="radio"/> |
| <b>besorgt</b>        | <input type="radio"/>               | <input type="radio"/>   | <input type="radio"/> | <input type="radio"/> | <input type="radio"/> |

**Haben Sie Angst vor den möglichen Auswirkungen der Covid-19-Pandemie? \***

Bitte wählen Sie die zutreffende Antwort für jeden Punkt aus:

|                                                                                | <b>trifft nicht zu</b> | <b>trifft eher nicht zu</b> | <b>teils, teils</b>   | <b>trifft eher zu</b> | <b>trifft zu</b>      |
|--------------------------------------------------------------------------------|------------------------|-----------------------------|-----------------------|-----------------------|-----------------------|
| <b>Ich habe Angst zu erkranken.</b>                                            | <input type="radio"/>  | <input type="radio"/>       | <input type="radio"/> | <input type="radio"/> | <input type="radio"/> |
| <b>Ich habe Angst, dass ein Angehöriger oder Bekannter erkrankt.</b>           | <input type="radio"/>  | <input type="radio"/>       | <input type="radio"/> | <input type="radio"/> | <input type="radio"/> |
| <b>Ich habe Angst vor beruflichen Veränderungen.</b>                           | <input type="radio"/>  | <input type="radio"/>       | <input type="radio"/> | <input type="radio"/> | <input type="radio"/> |
| <b>Ich habe existenzielle Ängste.</b>                                          | <input type="radio"/>  | <input type="radio"/>       | <input type="radio"/> | <input type="radio"/> | <input type="radio"/> |
| <b>Ich habe Angst vor finanziellen Verlusten.</b>                              | <input type="radio"/>  | <input type="radio"/>       | <input type="radio"/> | <input type="radio"/> | <input type="radio"/> |
| <b>Ich habe Angst vor Versorgungsengpässen.</b>                                | <input type="radio"/>  | <input type="radio"/>       | <input type="radio"/> | <input type="radio"/> | <input type="radio"/> |
| <b>Ich mache mir Sorgen um meine persönliche Zukunft.</b>                      | <input type="radio"/>  | <input type="radio"/>       | <input type="radio"/> | <input type="radio"/> | <input type="radio"/> |
| <b>Ich habe Angst vor weiteren Einschränkungen.</b>                            | <input type="radio"/>  | <input type="radio"/>       | <input type="radio"/> | <input type="radio"/> | <input type="radio"/> |
| <b>Die Unsicherheiten in Bezug auf die Zukunft machen mir Angst.</b>           | <input type="radio"/>  | <input type="radio"/>       | <input type="radio"/> | <input type="radio"/> | <input type="radio"/> |
| <b>Die Einschränkungen des öffentlichen Lebens wirken auf mich bedrohlich.</b> | <input type="radio"/>  | <input type="radio"/>       | <input type="radio"/> | <input type="radio"/> | <input type="radio"/> |

## Wie hat sich Ihr Alltag während der Covid-19-Krise verändert? \*

Bitte wählen Sie die zutreffende Antwort für jeden Punkt aus:

|                                                               | trifft nicht<br>zu    | trifft eher<br>nicht zu | teils, teils          | trifft eher zu        | trifft zu             |
|---------------------------------------------------------------|-----------------------|-------------------------|-----------------------|-----------------------|-----------------------|
| Ich verbringe mehr Zeit mit Personen in meinem Haushalt.      | <input type="radio"/> | <input type="radio"/>   | <input type="radio"/> | <input type="radio"/> | <input type="radio"/> |
| Mein beruflicher Alltag ist stressiger geworden.              | <input type="radio"/> | <input type="radio"/>   | <input type="radio"/> | <input type="radio"/> | <input type="radio"/> |
| Ich habe mehr zu tun als vor der Corona-Krise.                | <input type="radio"/> | <input type="radio"/>   | <input type="radio"/> | <input type="radio"/> | <input type="radio"/> |
| Ich habe mehr Zeit für mich selbst.                           | <input type="radio"/> | <input type="radio"/>   | <input type="radio"/> | <input type="radio"/> | <input type="radio"/> |
| Ich habe weniger Kontakt zu Menschen, die mir wichtig sind.   | <input type="radio"/> | <input type="radio"/>   | <input type="radio"/> | <input type="radio"/> | <input type="radio"/> |
| Ich vermisse soziale Kontakte.                                | <input type="radio"/> | <input type="radio"/>   | <input type="radio"/> | <input type="radio"/> | <input type="radio"/> |
| Ich empfinde die derzeitigen Einschränkungen entschleunigend. | <input type="radio"/> | <input type="radio"/>   | <input type="radio"/> | <input type="radio"/> | <input type="radio"/> |
| Mein Familienalltag ist stressiger/anstrengender geworden.    | <input type="radio"/> | <input type="radio"/>   | <input type="radio"/> | <input type="radio"/> | <input type="radio"/> |
| Ich habe mehr Kontakt mit Freunden und Familie                | <input type="radio"/> | <input type="radio"/>   | <input type="radio"/> | <input type="radio"/> | <input type="radio"/> |
| Ich bin häufiger allein.                                      | <input type="radio"/> | <input type="radio"/>   | <input type="radio"/> | <input type="radio"/> | <input type="radio"/> |
| Ich kann meinen Hobbies nicht mehr nachgehen.                 | <input type="radio"/> | <input type="radio"/>   | <input type="radio"/> | <input type="radio"/> | <input type="radio"/> |
| Ich empfinde die derzeitige Berichterstattung bedrohlich.     | <input type="radio"/> | <input type="radio"/>   | <input type="radio"/> | <input type="radio"/> | <input type="radio"/> |
| Ich fühle mich gut informiert.                                | <input type="radio"/> | <input type="radio"/>   | <input type="radio"/> | <input type="radio"/> | <input type="radio"/> |
| Mir ist häufiger langweilig.                                  | <input type="radio"/> | <input type="radio"/>   | <input type="radio"/> | <input type="radio"/> | <input type="radio"/> |

**Empfinden Sie die Auswirkungen der Covid-19-Krise auf Ihren Job als angenehm? \***

❶ Bitte wählen Sie eine der folgenden Antworten:

Bitte wählen Sie nur eine der folgenden Antworten aus:

- ☐ Ja
- ☐ Nein

**Arbeiten Sie derzeit im Home-Office? \***

❶ Bitte wählen Sie eine der folgenden Antworten:

Bitte wählen Sie nur eine der folgenden Antworten aus:

- ☐ Ja
- ☐ Nein
- ☐ teils, teils

**Wie sehr treffen diese Aussagen auf Sie zu? \***

Beantworten Sie diese Frage nur, wenn folgende Bedingungen erfüllt sind:

Antwort war NICHT 'Nein' bei Frage '35 [COR20J04]' (Arbeiten Sie derzeit im Home-Office?)

Bitte wählen Sie die zutreffende Antwort für jeden Punkt aus:

|                                                                 | trifft nicht zu       | trifft eher nicht zu  | teils, teils          | trifft eher zu        | trifft zu             |
|-----------------------------------------------------------------|-----------------------|-----------------------|-----------------------|-----------------------|-----------------------|
| <b>Ich bin froh darüber, im Home-Office arbeiten zu können.</b> | <input type="radio"/> |
| <b>Ich habe durch die Arbeit im Home-Office mehr Freizeit.</b>  | <input type="radio"/> |

**Wieviele Kinder betreuen Sie zur Zeit? \***

❶ Bitte wählen Sie eine der folgenden Antworten:

Bitte wählen Sie nur eine der folgenden Antworten aus:

- ☐ 0
- ☐ 1
- ☐ 2
- ☐ 3
- ☐ 4
- ☐ 5 und mehr

### Wann betreuen Sie Kinder? \*

Beantworten Sie diese Frage nur, wenn folgende Bedingungen erfüllt sind:

Antwort war '5 und mehr' oder '2' oder '3' oder '4' oder '1' bei Frage '37 [COR20J06]' (Wieviele Kinder betreuen Sie zur Zeit?)

❗ Bitte wählen Sie eine der folgenden Antworten:

Bitte wählen Sie nur eine der folgenden Antworten aus:

- ☐ vormittags
- ☐ nachmittags
- ☐ abends
- ☐ ganztätig

### Bleiben Sie aufgrund der Covid-19-Krise, abgesehen von notwendigen Erledigungen, hauptsächlich zu Hause? \*

❗ Bitte wählen Sie eine der folgenden Antworten:

Bitte wählen Sie nur eine der folgenden Antworten aus:

- ☐ Ja
- ☐ Nein

Die Umfragung ist nun beendet. Vielen Dank für Ihre Teilnahme!

Für Anregung und Kommentare nutzen Sie bitte das unten stehende Feld.

Bitte geben Sie Ihre Antwort hier ein:

Übermittlung Ihres ausgefüllten Fragebogens:

Vielen Dank für die Beantwortung des Fragebogens.
